# Supplementary material
Source: MDPI journal article supplement (https://www.mdpi.com/2414-4088/4/2/12)
Supplement: s1 [file s1]

## QUESTIONNAIRE CONEXP019FLGM

|                        |        |        |
|------------------------|--------|--------|
| <b>No. participant</b> |        |        |
| <b>Group code</b>      | CON019 | EXP019 |
| <b>Date</b>            |        |        |

| Gradation (Likert scale) |     |        |            |
|--------------------------|-----|--------|------------|
| 1                        | 2   | 3      | 4          |
| None                     | Few | Enough | Completely |

| Block I: Socio-educational   |     |                                                                                                                       |           |                                     |
|------------------------------|-----|-----------------------------------------------------------------------------------------------------------------------|-----------|-------------------------------------|
| Variable                     | No. | Item                                                                                                                  | Choice    | <input checked="" type="checkbox"/> |
| Gender                       | 1   | Gender                                                                                                                | Boy       |                                     |
|                              |     |                                                                                                                       | Girl      |                                     |
| Age                          | 2   | Age                                                                                                                   | .....     |                                     |
| City                         | 3   | City                                                                                                                  | .....     |                                     |
| Nationality                  | 4   | Nationality                                                                                                           | .....     |                                     |
| Religion                     | 5   | Religion                                                                                                              | Christian |                                     |
|                              |     |                                                                                                                       | Muslim    |                                     |
|                              |     |                                                                                                                       | Jew       |                                     |
|                              |     |                                                                                                                       | Hinduist  |                                     |
|                              |     |                                                                                                                       | Atheist   |                                     |
|                              |     |                                                                                                                       | Other     |                                     |
| Course                       | 6   | What is your academic year currently?                                                                                 | .....     |                                     |
|                              | 7   | Have you ever repeated a course?                                                                                      | Yes       |                                     |
|                              |     |                                                                                                                       | No        |                                     |
| Learning difficulty          | 8   | Do you have any learning difficulties?                                                                                | .....     |                                     |
| Flipped and Gamification use | 9   | Number of teachers throughout your educational stage who have used traditional methodology                            | 0 – 1     |                                     |
|                              |     |                                                                                                                       | 2 – 3     |                                     |
|                              |     |                                                                                                                       | 4 or more |                                     |
|                              | 10  | Number of teachers throughout your educational stage who have employed flipped learning                               | 0 – 1     |                                     |
|                              |     |                                                                                                                       | 2 – 3     |                                     |
|                              |     |                                                                                                                       | 4 or more |                                     |
|                              | 11  | Number of teachers throughout your educational stage who have used gamification                                       | 0 – 1     |                                     |
|                              |     |                                                                                                                       | 2 – 3     |                                     |
|                              |     |                                                                                                                       | 4 or more |                                     |
| Ratings                      | 12  | What is your average grade in general?                                                                                | 0-4.9     |                                     |
|                              |     |                                                                                                                       | 5-5.9     |                                     |
|                              |     |                                                                                                                       | 6-8.9     |                                     |
|                              |     |                                                                                                                       | 9-10      |                                     |
|                              | 13  | What is your general average in Language and Literature subject?                                                      | 0-4.9     |                                     |
|                              |     |                                                                                                                       | 5-5.9     |                                     |
|                              |     |                                                                                                                       | 6-8.9     |                                     |
|                              |     |                                                                                                                       | 9-10      |                                     |
|                              | 14  | What has been the grade you have obtained in Language and Literature subject after the development of the experience? | 0-4.9     |                                     |
|                              |     |                                                                                                                       | 5-5.9     |                                     |
|                              |     |                                                                                                                       | 6-8.9     |                                     |
|                              |     |                                                                                                                       | 9-10      |                                     |

| Block II: Availability and Resources |     |                                                                                                                        |           |   |   |   |  |
|--------------------------------------|-----|------------------------------------------------------------------------------------------------------------------------|-----------|---|---|---|--|
| Variable                             | No. | Item                                                                                                                   | Gradation |   |   |   |  |
|                                      |     |                                                                                                                        | 1         | 2 | 3 | 4 |  |
| Availability                         | 15  | Do you consider that your center is equipped with enough technological material to carry out innovative methodologies? |           |   |   |   |  |
|                                      | 16  | What is the degree of preparation of your teachers to use educational technologies in the classroom?                   |           |   |   |   |  |
|                                      | 17  | What is your degree of preparation to use educational technologies in the classroom?                                   |           |   |   |   |  |
| Innovative and ICT resources         | 18  | How often do you use classroom blogs in the educational context?                                                       |           |   |   |   |  |
|                                      | 19  | How often do you use social networks in the general educational field?                                                 |           |   |   |   |  |
|                                      | 20  | How often do you use programs to create didactic videos in general?                                                    |           |   |   |   |  |
|                                      | 21  | How often do you use programs to create didactic podcast in general?                                                   |           |   |   |   |  |
|                                      | 22  | How often do you use scoring systems, levels and rewards in your learning?                                             |           |   |   |   |  |
|                                      | 23  | How often do you use Learning Management Systems in the educational context?                                           |           |   |   |   |  |
|                                      | 24  | How often do you use video games or board games in the educational context?                                            |           |   |   |   |  |

| Block III: Methodological factor |     |                                                                                                                                                          |           |   |   |   |  |
|----------------------------------|-----|----------------------------------------------------------------------------------------------------------------------------------------------------------|-----------|---|---|---|--|
| Variable                         | No. | Item                                                                                                                                                     | Gradation |   |   |   |  |
|                                  |     |                                                                                                                                                          | 1         | 2 | 3 | 4 |  |
| Motivation                       | 25  | How does the methodology you normally receive in the subject of Language and Literature contribute to your motivation?                                   |           |   |   |   |  |
|                                  | 26  | How much has the methodology of this experience contributed to your motivation?                                                                          |           |   |   |   |  |
| Cooperation                      | 27  | How does the methodology you normally receive in the subject of Language and Literature contribute to cooperation during learning activities?            |           |   |   |   |  |
|                                  | 28  | How much has the methodology of this experience contributed to cooperation during learning activities?                                                   |           |   |   |   |  |
| Autonomy                         | 29  | How does the methodology you normally receive in the subject of Language and Literature contribute to the promotion of autonomy?                         |           |   |   |   |  |
|                                  | 30  | How much has the methodology of this experience contributed to the promotion of autonomy?                                                                |           |   |   |   |  |
| Problem Solving                  | 31  | How does the methodology you normally receive in the subject of Language and Literature contribute to solving problems?                                  |           |   |   |   |  |
|                                  | 32  | How much has the methodology of this experience contributed to solving problems?                                                                         |           |   |   |   |  |
| Interaction Teacher              | 33  | How does the methodology you normally receive in the subject of Language and Literature contribute to interaction with your teachers?                    |           |   |   |   |  |
|                                  | 34  | How much has the methodology of this experience contributed to interaction with your teachers?                                                           |           |   |   |   |  |
| Interaction Classmates           | 35  | How does the methodology you normally receive in the subject of Language and Literature contribute to interaction with your classmates?                  |           |   |   |   |  |
|                                  | 36  | How much has the methodology of this experience contributed to interaction with your classmates?                                                         |           |   |   |   |  |
| Interaction Contents             | 37  | How does the methodology you normally receive in the subject of Language and Literature contribute to access, use and manageability of learning content? |           |   |   |   |  |
|                                  | 38  | How much has the methodology of this experience contributed to access, use and manageability of learning content?                                        |           |   |   |   |  |
| Class Time                       | 39  | How does the methodology you normally receive in the subject of Language and Literature contribute to the use of class time?                             |           |   |   |   |  |
|                                  | 40  | How much has the methodology of this experience contributed to the use of class time?                                                                    |           |   |   |   |  |
| Linguistic Competence            | 41  | How does the methodology you normally receive in the subject of Language and Literature contribute to improve Linguistic Competence?                     |           |   |   |   |  |
|                                  | 42  | How much has the methodology of this experience contributed to improve Linguistic Competence?                                                            |           |   |   |   |  |
